# Supplementary material
Source: PubMed Central journal article supplement (PMC2943311)

## SUPPLEMENTARY METHODS AND FIGURES

## SUPPLEMENTARY METHODS

*Isolation of mouse preadipocytes and in vitro differentiation*- Isolated epididymal fat tissue obtained from 6-wk-old male C57BL/6J mice was rinsed briefly with PBS and minced with a razor blade in collagenase solution (0.2 mg/ml collagenase A in 100 mM HEPES, 120 mM NaCl, 4.8 mM KCl, 1 mM CaCl<sub>2</sub> and 4.9 mM glucose, pH 7.4). The mixture was then allowed to digest for 30 min at 37°C with gentle shaking. The resulting cell suspension was allowed to settle for 5 min to separate into a supernatant containing adipocytes and an inferior layer composed mainly of preadipocytes. The adipocyte-containing supernatant was recovered by pipetting and the infranatant was filtered through a 60 µm cell strainer (BD, Franklin Lakes, NJ) to obtain the preadipocytes. Differentiation was carried out two days after seeding by replacing the media with DMEM supplemented with 10% FBS, 33 µM biotin, 17 µM pantotenate, 100 nM insulin, 1 nM dexamethasone, 0.25 mM IBMX and 1 µM rosiglitazone.

*Transfection of D5 adipocytes.* For transfection of D5 adipocytes, 3T3-L1 cells were differentiated in 24-well plates as described. At D5, cells were trypsinized, reseeded and transfected while in suspension with the same conditions detailed for D0 fibroblasts. RNA was analyzed 48h after transfection (D7).

## SUPPLEMENTARY FIGURES

**Suppl Fig.1:** *Expression profiles of the studied genes in 3T3-L1 cells throughout adipogenesis.* 3T3-L1 cells were differentiated as usual and RNA was extracted at different days during the process and analyzed by real time RT-PCR. *Cebpa* expression increases over 250 times during differentiation, an order of magnitude above the increases of other adipogenic transcription factors such as *cebpb*, *pparg* or *foxo1*. Adipocytokine *apml* is even more strongly induced. Anti-adipogenic *dlk1*, on the other hand, must decrease for adipogenesis to proceed. Values are corrected by housekeeping *actb* levels, using specific TaqMan primers and probes. Results are mean  $\pm$  SD of three experiments performed in duplicate. \* $<0.05$ , \*\* $<0.005$ , \*\*\* $<0.001$ , \*\*\*\* $<0.0005$

**Suppl Fig.2:** *Expression of HMTs and HDMs increase during adipogenesis.* Mouse primary preadipocytes were obtained from male 6wk old mice and differentiated *in vitro*. **A.** Expression of several HDMs and HMTs was analyzed at different time points during the differentiation process. **B.** Expression of several markers of adipocyte differentiation was measured as a control of the efficiency of the process. Results are the mean  $\pm$  SD of two experiments performed in triplicate. \* $<0.05$ , \*\* $<0.005$

**Suppl Fig 3:** *Knockdown of *lsd1* blocks induction of adipogenesis.* **A.** siLsd1 and siSetdb1 siRNAs specifically affect expression of their cognate RNAs. D0 cells were transfected with the indicated siRNAs and total RNA was extracted 72h after transfection and analyzed by real-time RT-PCR. **B.** siLsd1 transfection decreases *lsd1* expression in mature adipocytes. 3T3-L1 cells were differentiated as usual. At D5, adipocytes were transfected with siC or siLsd1 siRNAs. Total RNA was extracted 48h after transfection (D7) and analyzed by real-time RT-PCR. **C.** Schematic of the experimental design used to analyze the effect of siLsd1 on the induction of adipogenesis. For some experiments, 3T3-L1 cells were transfected as undifferentiated fibroblasts and RNA was extracted 24h, 48h and 72h after transfection (arrows). Cells were then stimulated to differentiate and RNA was extracted at D1, D3, D5 and D7. For the study of mature adipocytes, 3T3-L1 were differentiated as usual and RNA was extracted and analyzed 48h after transfection (D7). **D.** Knockdown of *lsd1* affects the expression of key adipogenic transcription factors in 3T3-L1 D0 fibroblasts (left panel) but not mature cells (right panel). RNA was extracted from transfected D0 cells at the indicated time points after transfection and analyzed by real time RT-PCR. In the case of mature adipocytes, cells were transfected at D5 and RNA was analyzed 48h after transfection (D7). Results are the mean  $\pm$  SD of three experiments performed in triplicate. \* $<0.05$ , \*\* $<0.005$ .

Suppl Table 1. Sequences of the different siRNAs used (5' to 3').

| Target       |                  |                           |
|--------------|------------------|---------------------------|
| siLsd1 (1)   | sense strand     | AUAGGUUCCAGAAGAGGAAGAGCUC |
|              | antisense strand | GAGCUCUUCCUCUUCUGGAACCUAU |
| siLsd1 (2)   | sense strand     | CAAGGAAAGCUAGAAGAAA       |
|              | antisense strand | UUUCUUCUAGCUUUCUUG        |
| siSetdb1 (1) | sense strand     | GGACGAUGCAGGAGAUAGA       |
|              | antisense strand | UCUAUCUCCUGCAUCGUCC       |
| siSetdb1 (2) | sense strand     | GGACUACAGUAUCAUGACA       |
|              | antisense strand | UGUCAUGAUACUGUAGUCC       |
| siC (1)      | sense strand     | UAAGGCUAUGAAGAGAUACUU     |
|              | antisense strand | AAGUAUCUCUUCAUAGCCUUA     |
| siC (2)*     | sense strand     | -                         |
|              | antisense strand | -                         |

\* Silencer® negative control siRNA #1 (Applied Biosystems)

Suppl Table 2. List of primers and probe sets used for real time RT-PCR analysis

| Target         | Reference (ABI) | Ref Seq ID             |
|----------------|-----------------|------------------------|
| <i>Actb</i>    | Mm00607939_s1   | NM_007393              |
| <i>Apm1</i>    | Mm01343606_m1   | NM_009605              |
| <i>Cebpa</i>   | Mm00514283_s1   | NM_007678              |
| <i>Cepb</i>    | Mm00843434_s1   | NM_009883              |
| <i>Dlk1</i>    | Mm00494477_m1   | NM_010052              |
| <i>Ehmt2</i>   | Mm01132261_m1   | NM_145830/NM_147151    |
| <i>Fabp4</i>   | Mm00445880_m1   | NM_024406              |
| <i>FoxO1</i>   | Mm00490672_m1   | NM_019739              |
| <i>Glut4</i>   | Mm01245502_m1   | NM_009204              |
| <i>Jarid1a</i> | Mm00524465_m1   | NM_145997              |
| <i>Jarid1b</i> | Mm03053411_s1   | NM_152895              |
| <i>Jmjd1a</i>  | Mm01182127_m1   | NM_173001/NM_001038695 |
| <i>Jmjd1b</i>  | Mm00804683_m1   | NM_001081256           |
| <i>Jmj2da</i>  | Mm00805000_m1   | NM_172382/NM_001161823 |
| <i>Jmj2c</i>   | Mm00460578_m1   | NM_144787              |
| <i>Lsd1</i>    | Mm01181029_m1   | NM_133872              |
| <i>Leptin</i>  | Mm00434759_m1   | NM_008493              |
| <i>Ppparg</i>  | Mm00440945_m1   | NM_001127330/NM_011146 |
| <i>Retn</i>    | Mm00445641_m1   | NM_022984              |
| <i>Setd1a</i>  | Mm00626143_m1   | NM_178029              |
| <i>Setd7</i>   | Mm00499823_m1   | NM_080793              |
| <i>Setdb1</i>  | Mm00450791_m1   | AK132202.1             |

Suppl Table 3. List of primers and probe sets used for the analysis of chromatin immunoprecipitations

| Target       |                           |                          |
|--------------|---------------------------|--------------------------|
| <i>actb</i>  | Forward Primer (5' to 3') | CCACACCCGCCACCA          |
|              | Reverse Primer (5' to 3') | GTGAGGTACTAGCCACGAGAGA   |
|              | Reporter (5' to 3')       | CCGGCGTCCCTGCTTA         |
|              | Position relative to TIS  | +55 to +127              |
| <i>apm1</i>  | Forward Primer (5' to 3') | AACCAGGTTCCCTAAGGAGTCT   |
|              | Reverse Primer (5' to 3') | GAGTGGGCCCCTTGCT         |
|              | Reporter (5' to 3')       | CCTGGCAGCTGCCTTA         |
|              | Position relative to TIS  | -164 to -110             |
| <i>cebpa</i> | Forward Primer (5' to 3') | GGGCGCGAGCCAGTT          |
|              | Reverse Primer (5' to 3') | GTGGCGCCGCTGTC           |
|              | Reporter (5' to 3')       | CCACCCAGTGCCCC           |
|              | Position relative to TIS  | +22 to +72               |
| <i>dlk1</i>  | Forward Primer (5' to 3') | GGTCCTCCTGGGCTTCTGA      |
|              | Reverse Primer (5' to 3') | GCTCACAGACACAGTAAGACACTT |
|              | Reporter (5' to 3')       | TCCCGCGCACACATG          |
|              | Position relative to TIS  | -150 to -75              |
| <i>myod</i>  | Forward Primer (5' to 3') | CTGCCCCAGCACAGAGT        |
|              | Reverse Primer (5' to 3') | AGTGTAGTAGGGCGGAGCTT     |
|              | Reporter (5' to 3')       | CCCCAGTGGCTACCC          |
|              | Position relative to TIS  | -191 to -107             |

Musri et al.  
**Suppl Fig 1**

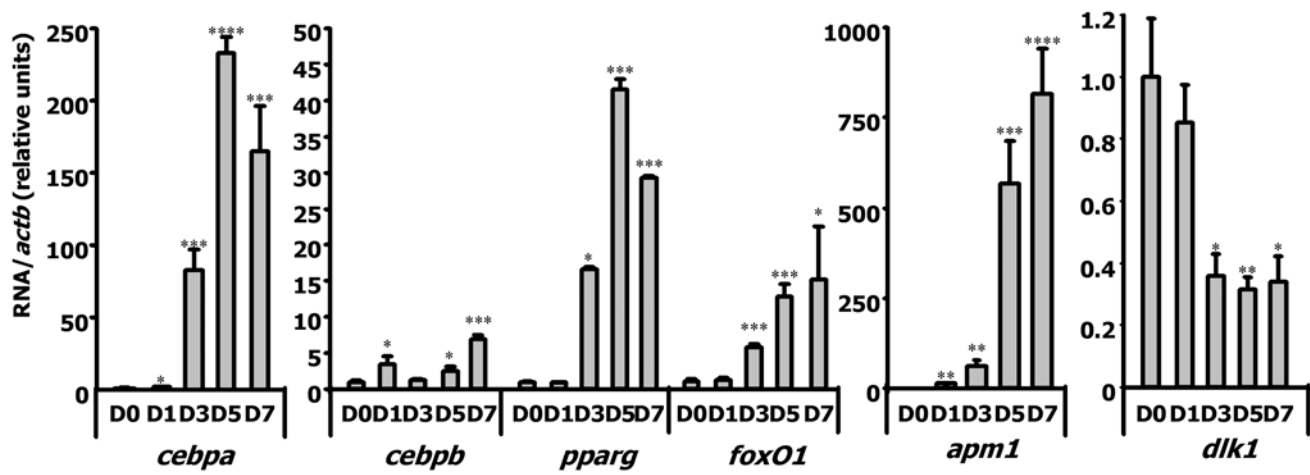

**A**

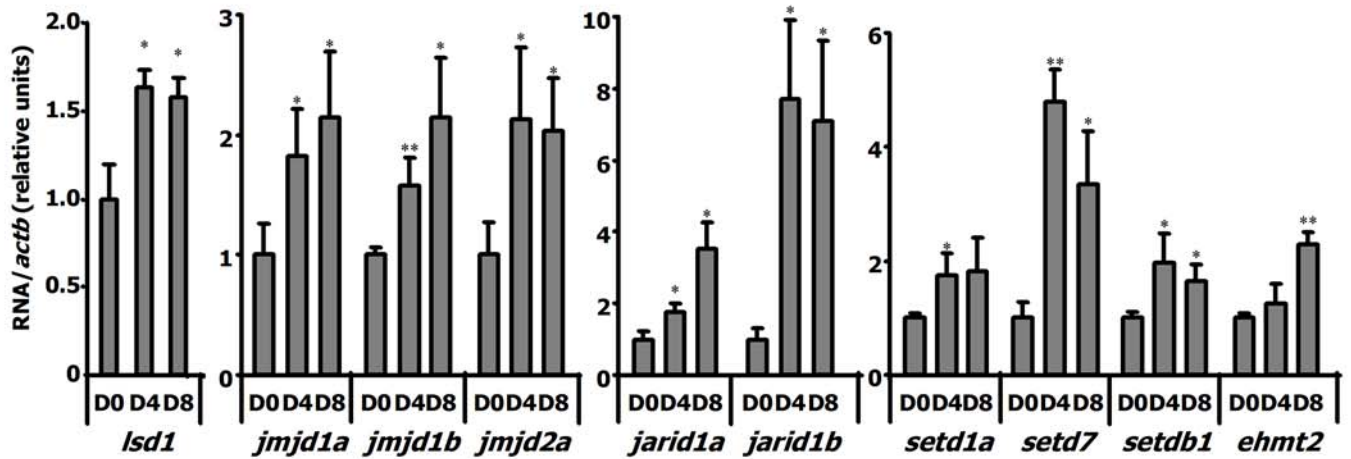

**B**

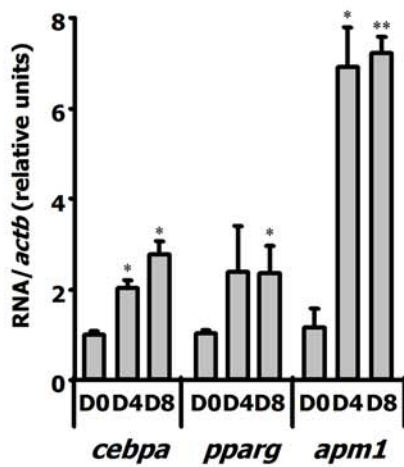

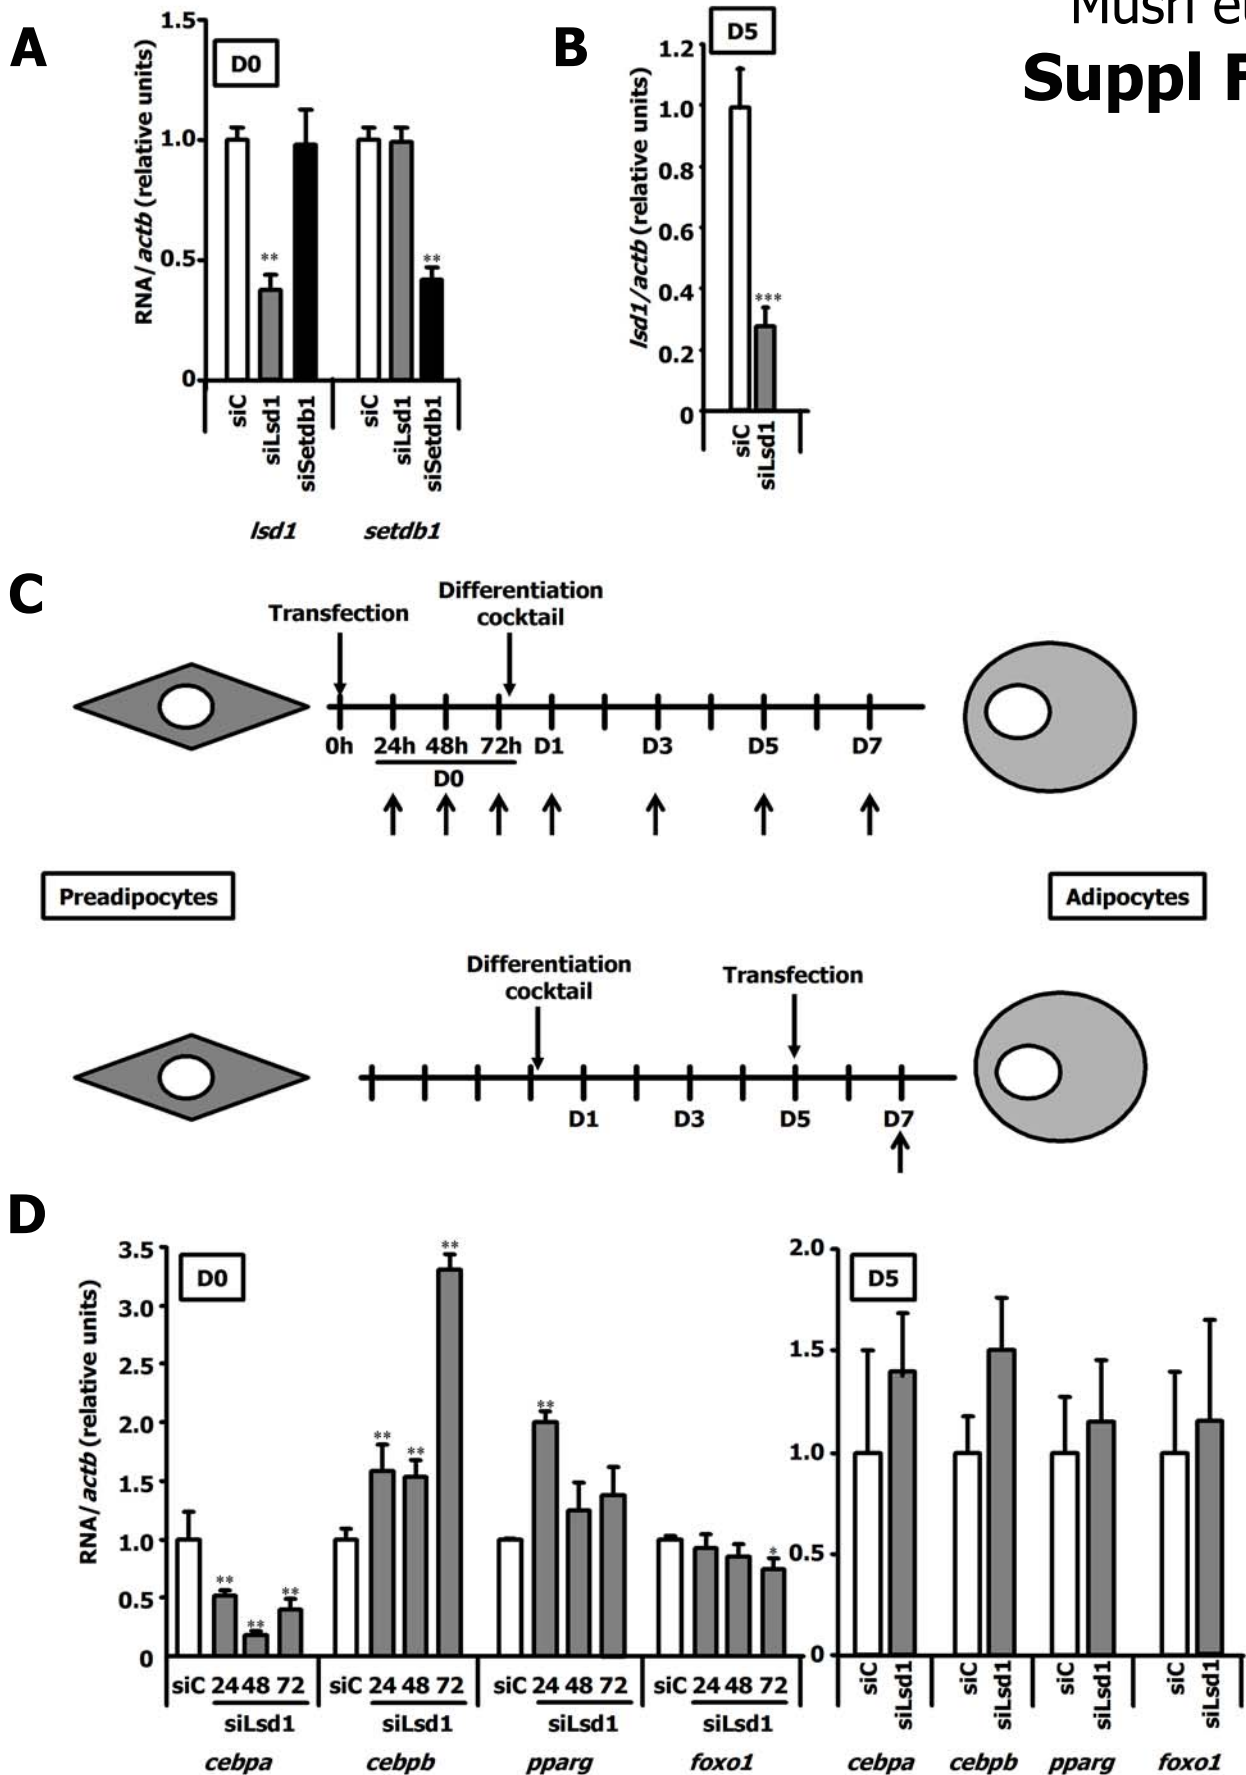

Supplement: supp_M110.151209_SUPPLDATA_3289.pdf [file supp_M110.151209_SUPPLDATA_3289.pdf]
